# Supplementary material for: Decreased sirtuin 4 levels promote cellular proliferation and invasion in papillary thyroid carcinoma
Source: PubMed Central journal article supplement — Eur Thyroid J. 2024 Sep 16;13(5):e240079. doi: 10.1530/ETJ-24-0079 (PMC11466257; doi:10.1530/etj-24-0079), 2024-09-16

# Supplement 5.

## Uncropped western blots cited in Figures.

Fig. 2

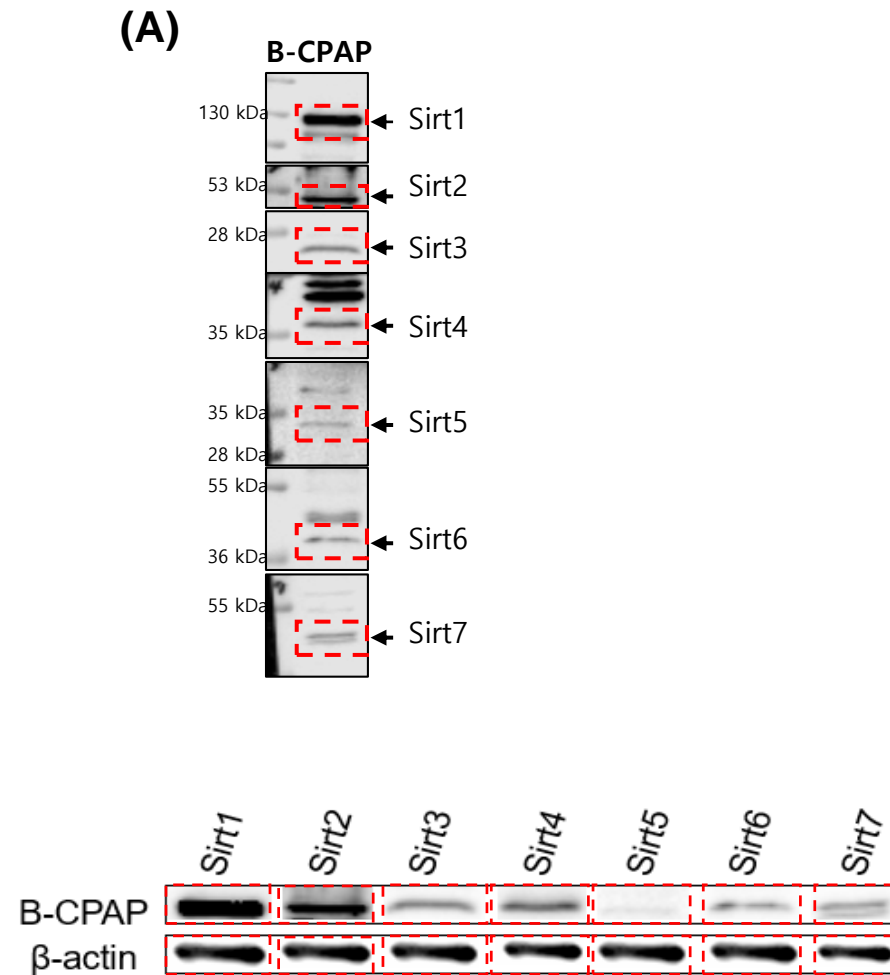

Fig. 4

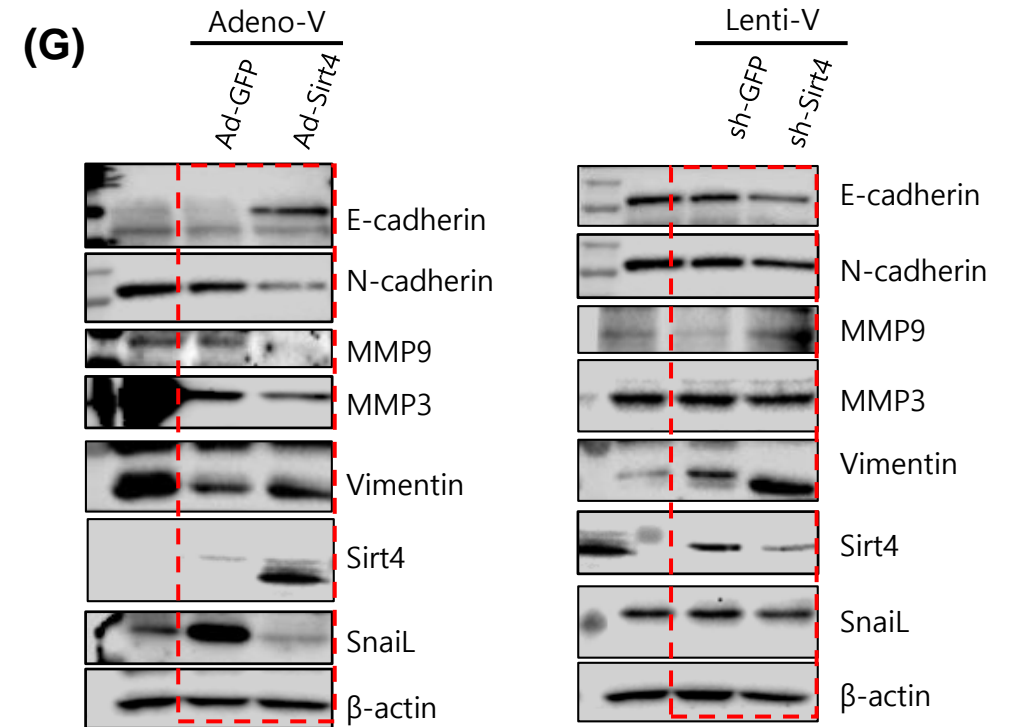

# Uncropped western blots cited in Supplement figures.

Fig. S2

(A)

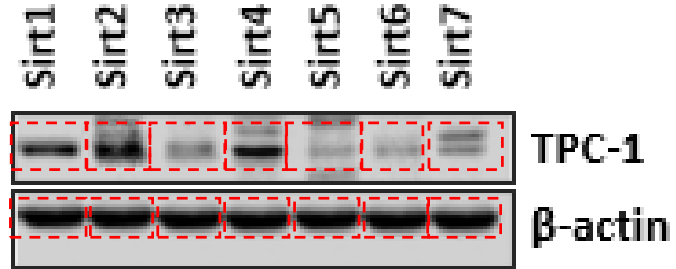

(D)

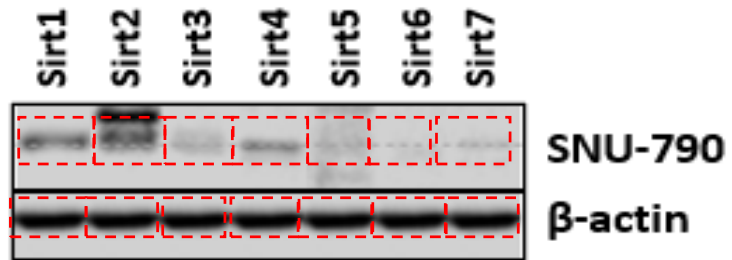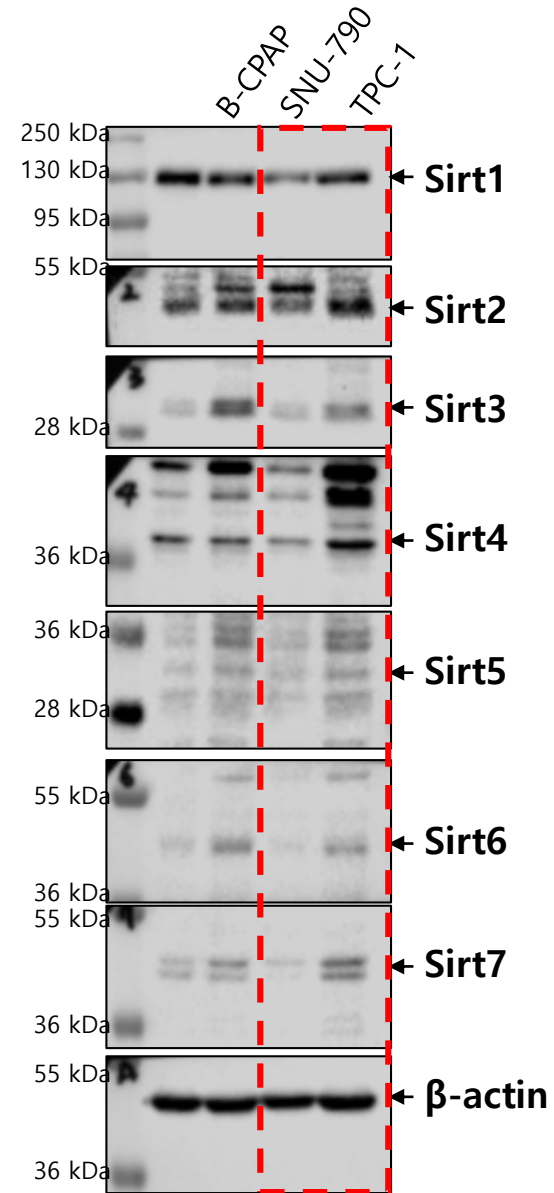

**Fig. S4 (I)**

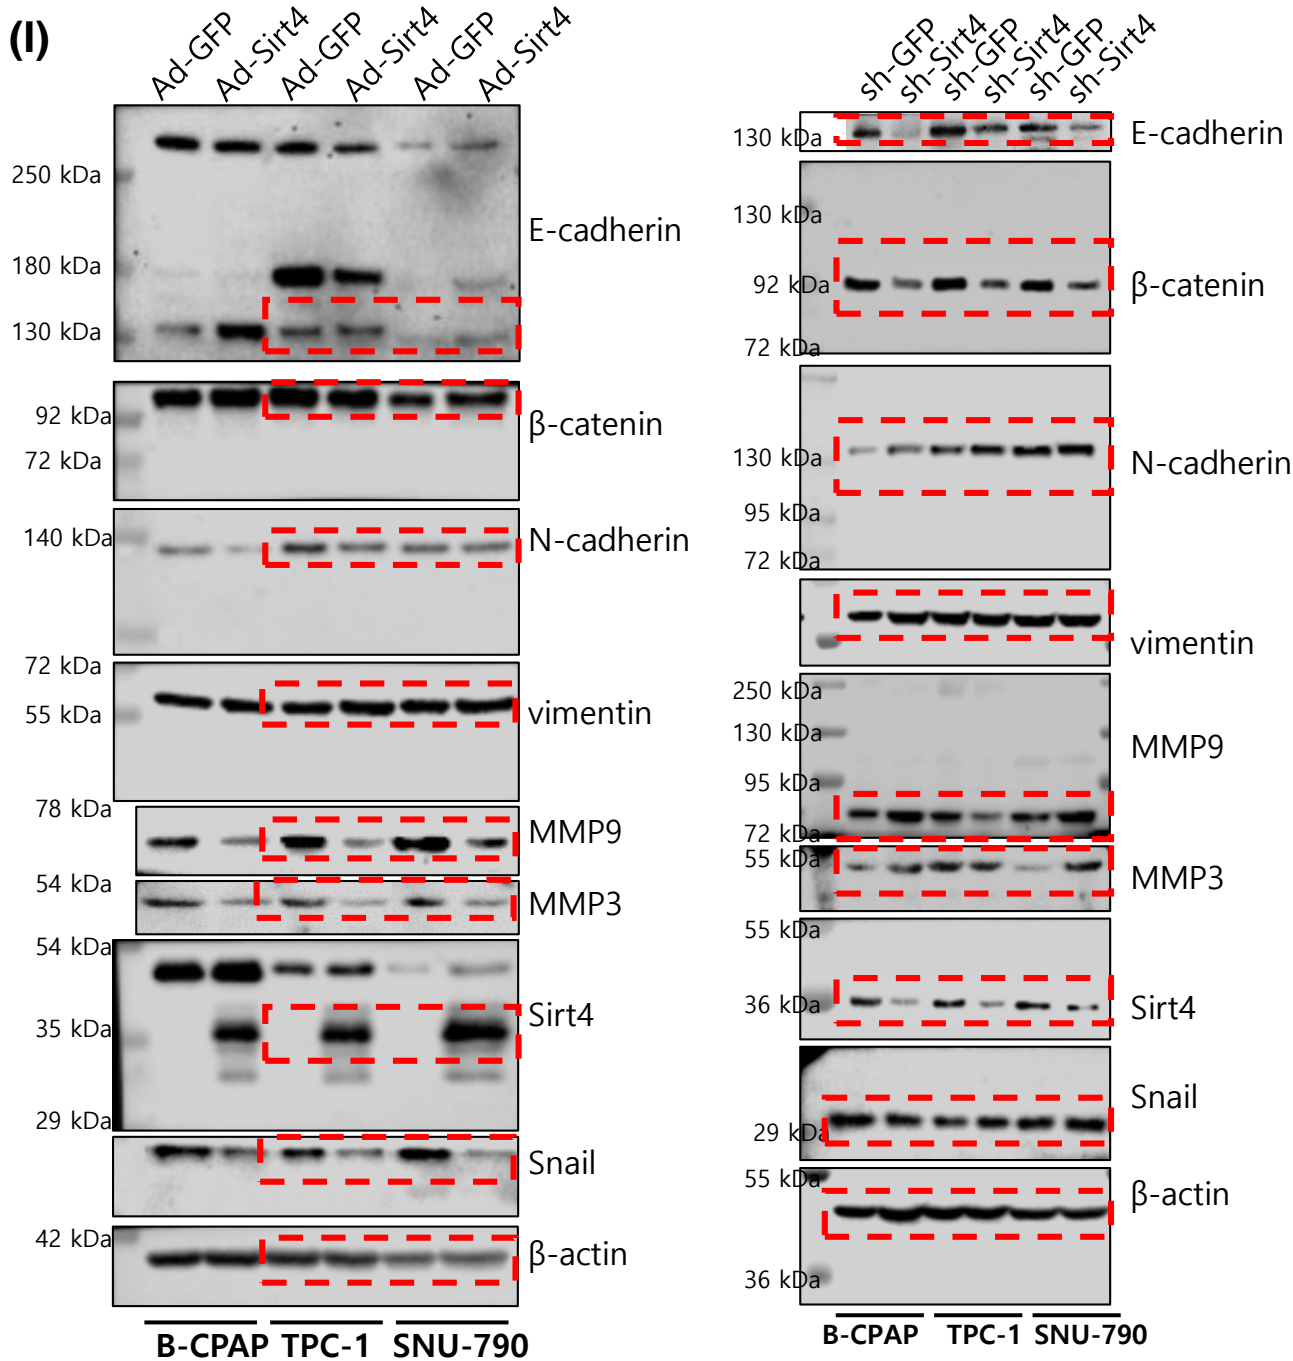

Supplement: supplementary_figure_4.pdf [file supplementary_figure_4.pdf]
