# Supplementary material for: Decreased sirtuin 4 levels promote cellular proliferation and invasion in papillary thyroid carcinoma
Source: PubMed Central journal article supplement — Eur Thyroid J. 2024 Sep 16;13(5):e240079. doi: 10.1530/ETJ-24-0079 (PMC11466257; doi:10.1530/etj-24-0079), 2024-09-16
Supplement: supplementary_table_1.pdf [file supplementary_table_1.pdf]

**Supplement 1. Demographic characteristics of patients with papillary thyroid carcinoma.**

| Characteristics                   | Number (%)            |
|-----------------------------------|-----------------------|
| Age (years)                       |                       |
| Mean at diagnosis (range)         | 49.58 ± 11.08 (24–74) |
| <55                               | 133 (64.9)            |
| ≥55                               | 72 (35.1)             |
| Sex                               |                       |
| Female                            | 162 (79.0)            |
| Male                              | 43 (21.0)             |
| Tumor size (mm)                   |                       |
| Mean (range)                      | 6.6 ± 2.1 (1–10)      |
| <5 mm                             | 38 (18.5)             |
| ≥5 mm                             | 167 (81.5)            |
| Tumor extension                   |                       |
| Confinement to thyroid parenchyma | 126 (61.5)            |
| Extrathyroid extension            | 79 (38.5)             |
| Cervical lymph node metastasis    |                       |
| Absent                            | 145 (70.7)            |
| Present                           | 60 (29.3)             |
| Resection margin                  |                       |
| Clear                             | 184 (89.8)            |
| Closed                            | 7 (3.4)               |
| Involved                          | 14 (6.8)              |
| Sirt4 expression                  |                       |
| Negative                          | 86 (42.0)             |
| Positive                          | 119 (58.0)            |

**Supplement 2. Sirt4 inhibits cell proliferation in TPC-1 (A-C) and SNU-790 (D-F) cells.**

(A) Expression levels of sirtuins in TPC-1 cells. (B) CCK-8 assay and (C) clonogenic assay of Sirt4-overexpressing and shSirt4-transfected TPC-1 cells compared with the controls. (D) Expression levels of sirtuins in SNU-790 cells. (E) CCK-8 assay and (F) clonogenic assay of Sirt4-overexpressing and shSirt4-transfected SNU-790 cells compared with the controls.

CCK-8, Cell Counting Kit-8.

**Supplement 3. Sirt4 promote cell apoptosis by modulating ROS levels in TPC-1 (A-D) and SNU-790 (E-H) cells.**

(A,B) The percentage of apoptotic cells in Sirt4-upregulated and -downregulated TPC-1 cells. (C) Differences in total ROS levels upon regulation of Sirt4 expression. (D) Changes in MitoSox Red levels and the intensity of MTDR by regulating Sirt4 expression in TPC-1 cells. (E-H) These findings were consistent with results from SNU-790 cells.

**Supplement 4. Sirt4 regulates the invasion and migration of TPC-1 and SNU-790 cells.**

(A-D) Results of invasion, migration, and wound healing assays of Sirt4-upregulation and downregulation in TPC-1 cells compared with the controls. (E-H) These results were consistent with results from SNU-790 cells. (I) Modulation of EMT-related proteins by Sirt4 expression in three human thyroid cancer cell lines, B-CPAP, TPC-1, and SNU-790.

**Supplement 5. Uncropped western blots cited in Figures and Supplement figures.**
