# Supplementary figures and images for: Decreased sirtuin 4 levels promote cellular proliferation and invasion in papillary thyroid carcinoma
Source: PubMed Central journal article supplement — Eur Thyroid J. 2024 Sep 16;13(5):e240079. doi: 10.1530/ETJ-24-0079 (PMC11466257; doi:10.1530/etj-24-0079), 2024-09-16

A

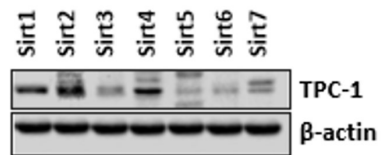

B

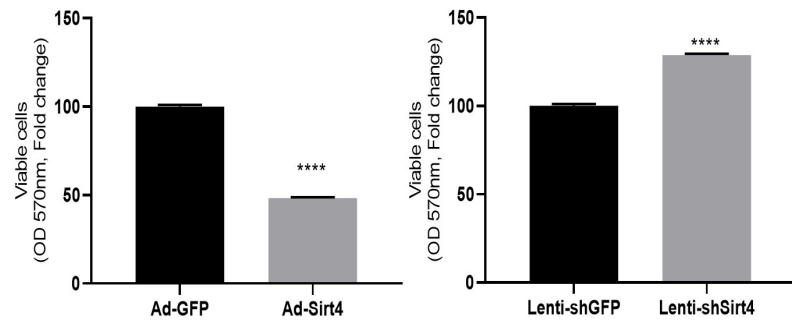

D

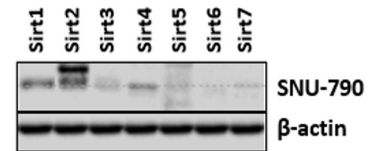

E

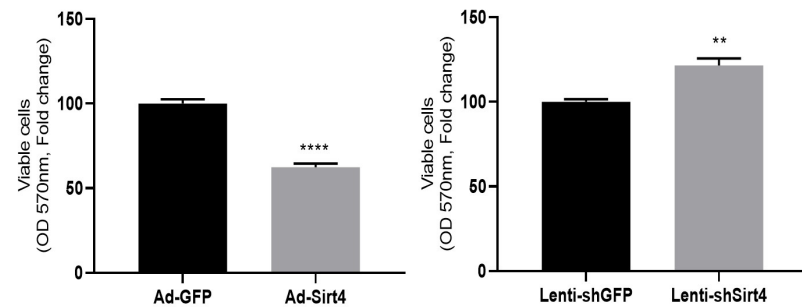

C

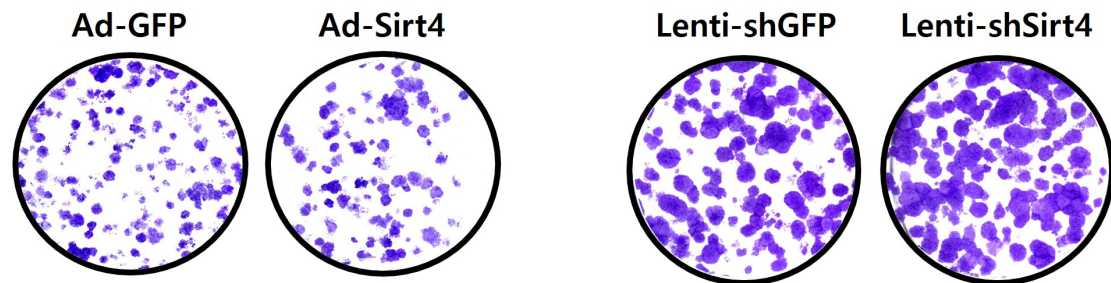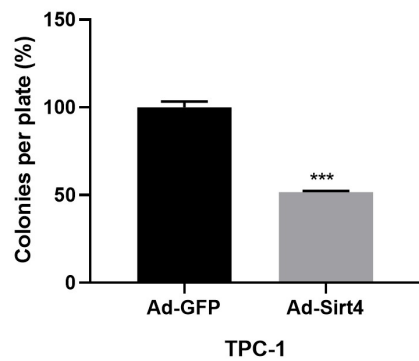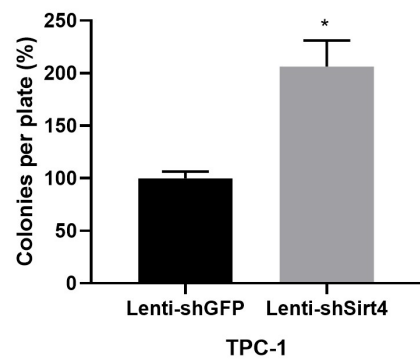

F

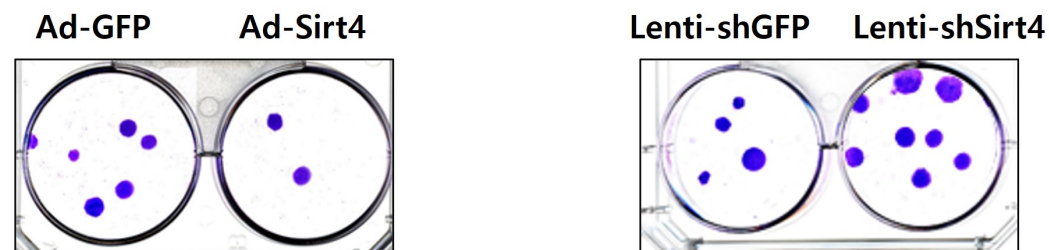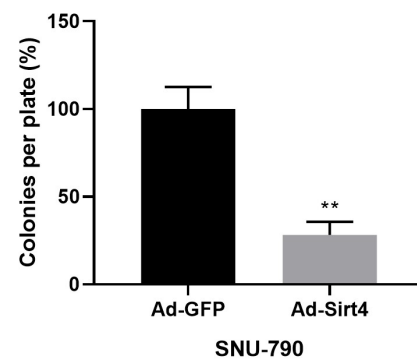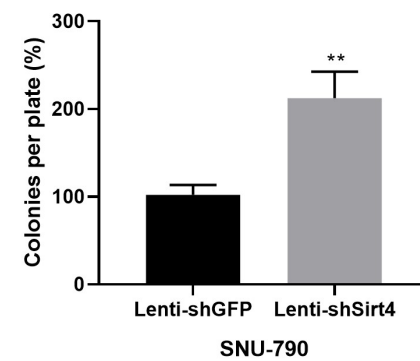

Supplement: supplementary_figure_1.pdf [file supplementary_figure_1.pdf]

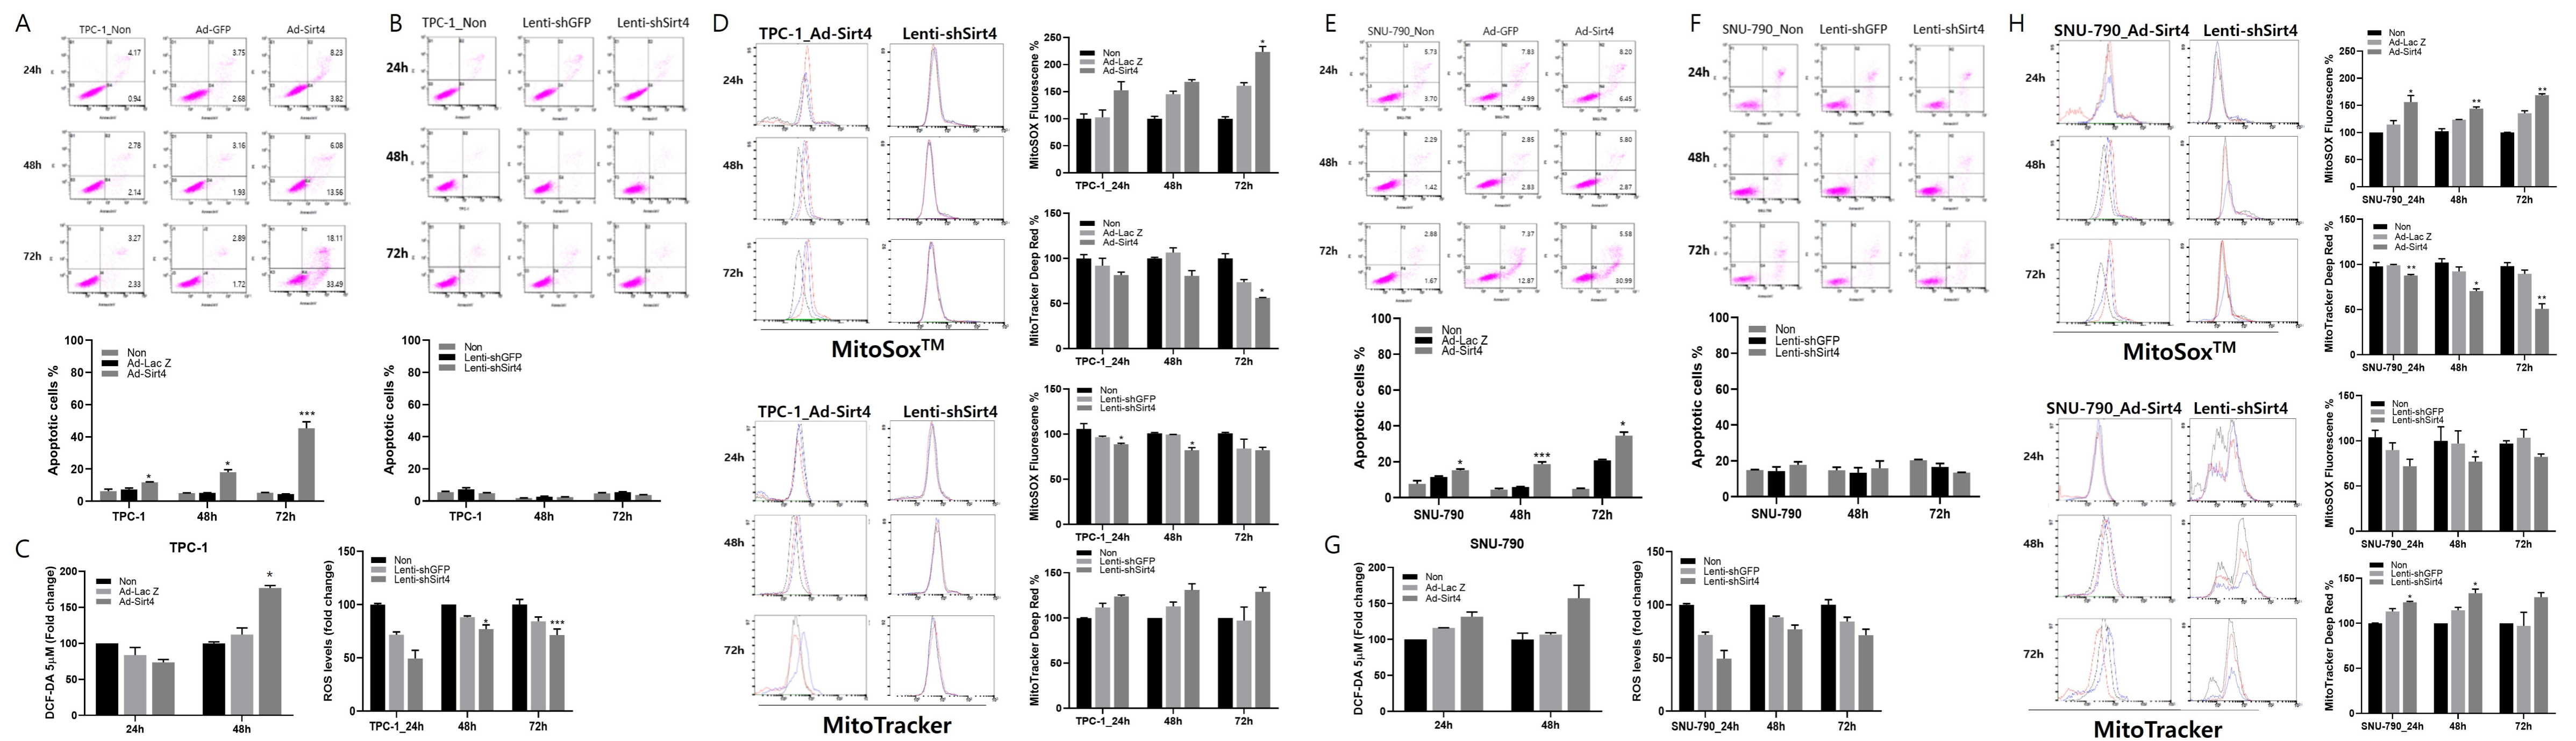

Supplement: supplementary_figure_2.pdf [file supplementary_figure_2.pdf]

A

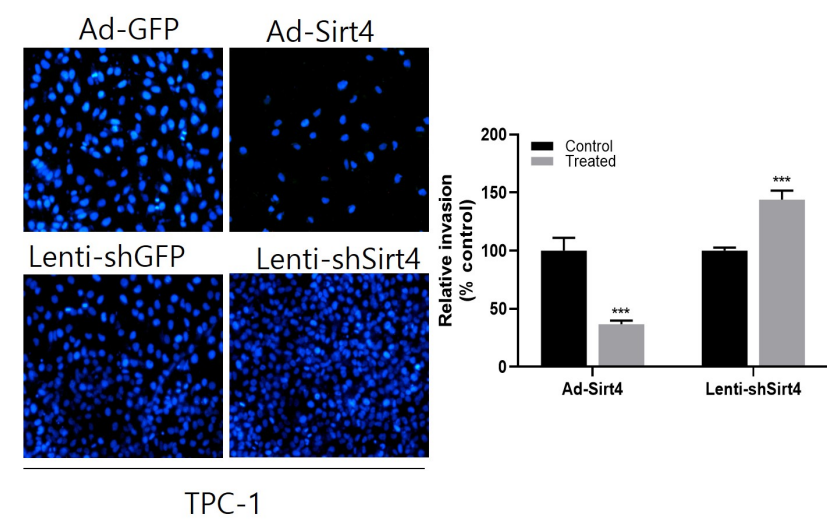

C

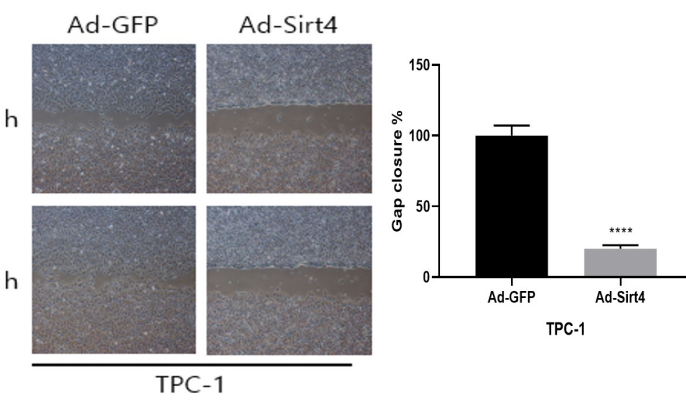

E

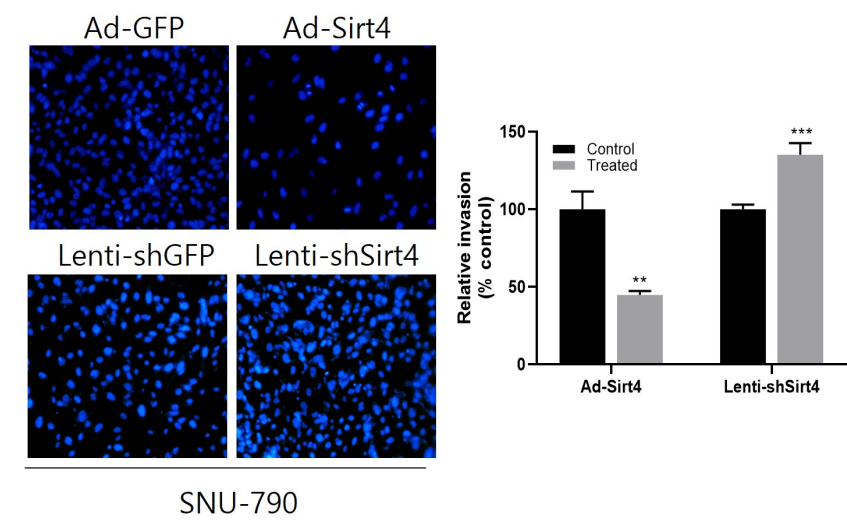

G

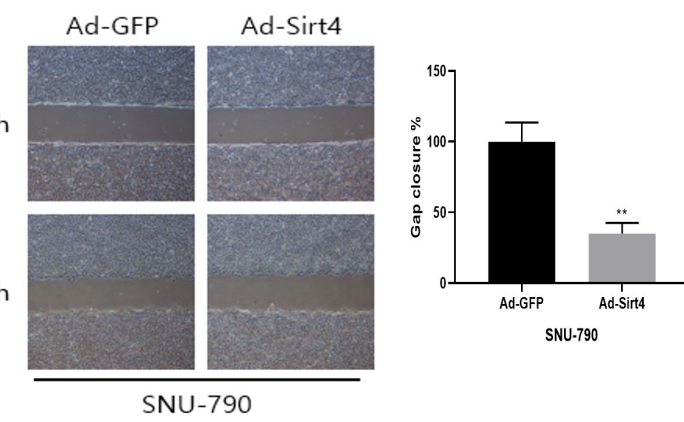

I

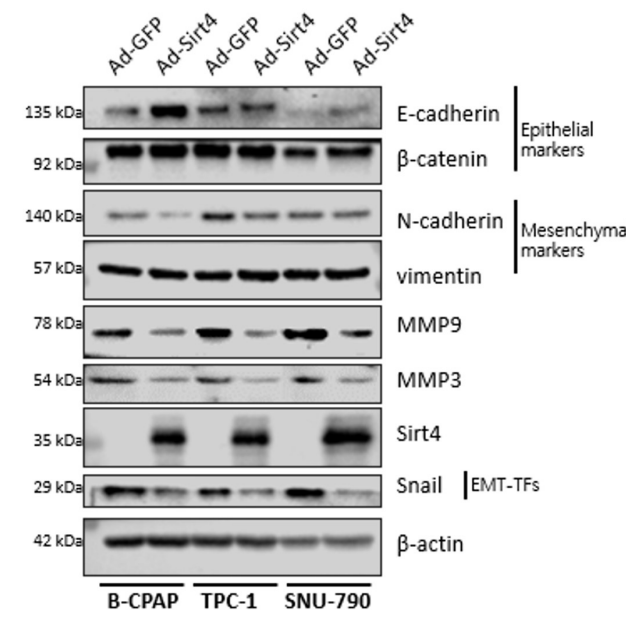

B

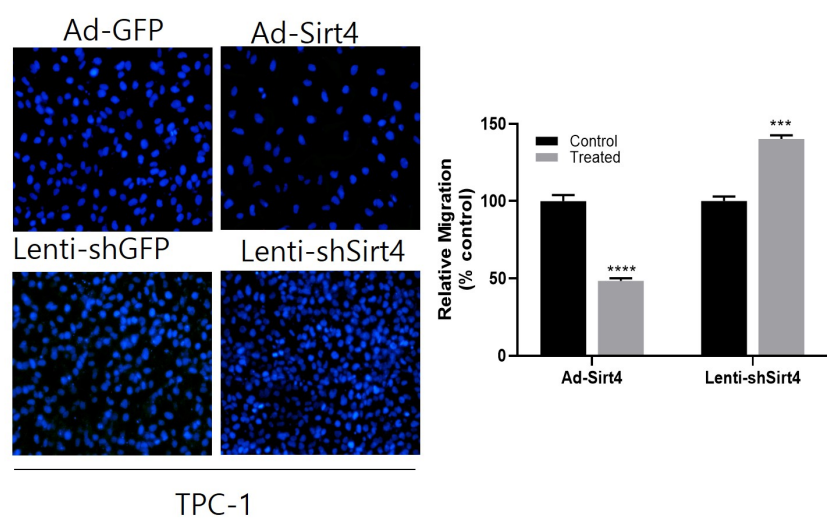

D

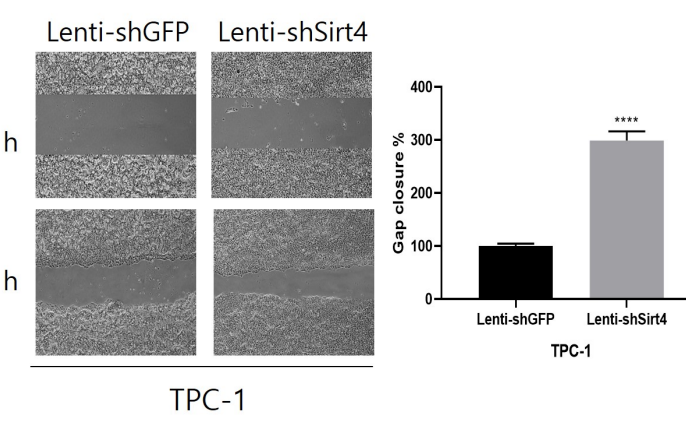

F

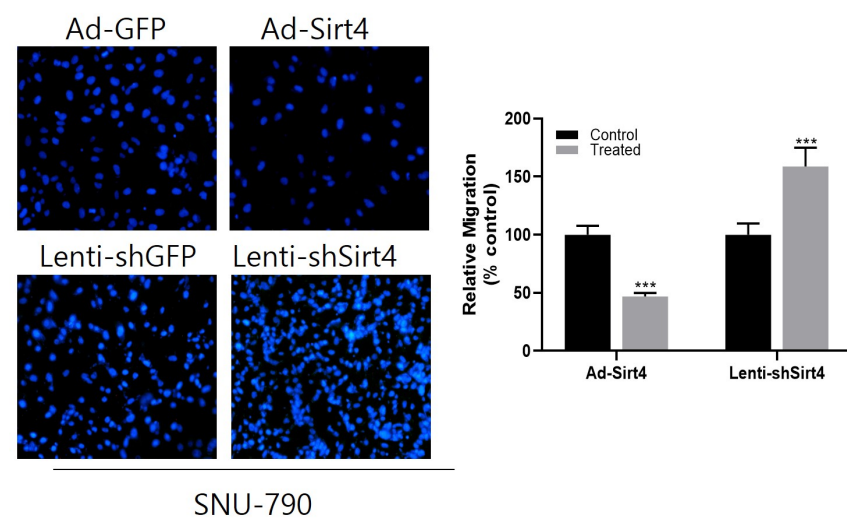

H

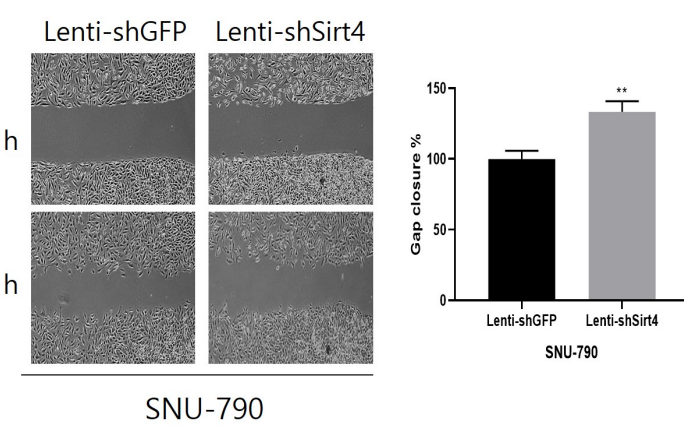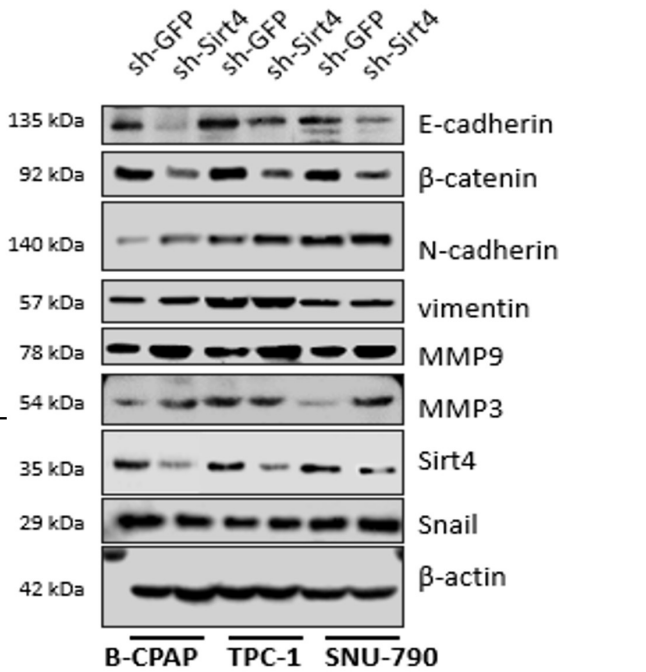

Supplement: supplementary_figure_3.pdf [file supplementary_figure_3.pdf]
